# Supplementary material for: Acute toxicity and metabolism of pesticides in birds
Source: PubMed Central journal article supplement — J Pestic Sci. 2021 Nov 20;46(4):305–21. doi: 10.1584/jpestics.D21-028 (PMC8640698; doi:10.1584/jpestics.d21-028), 2021-11-20
Supplement: jps-46-4-D21-028-s001.pdf [file jps-46-4-D21-028-s001.pdf]

|                           |     |                                                                              |       |       |       |       |        |
|---------------------------|-----|------------------------------------------------------------------------------|-------|-------|-------|-------|--------|
| <i>beta</i> -cyfluthrin   | I   | Na channel modulator                                                         |       |       |       | 170   | 1189   |
| <i>beta</i> -cypermethrin | I   | Na channel modulator                                                         | >2000 |       |       |       | 93     |
| bifenazate                | A   | Mitochondrial complex III electron transport inhibitor                       | 1036  |       |       | >2000 | >5000  |
| bifenox                   | H   | Inhibition of protoporphyrinogen oxidase                                     | >2000 | >4640 |       |       | 1600   |
| bifenthrin                | I   | Na channel modulator                                                         | 1800  | >2150 |       |       | 54.5   |
| bispyribac                | H   | Inhibition of acetolactate synthase                                          | >2250 |       |       |       | 2635   |
| bitertanol                | F   | C <sub>14</sub> -demethylase in sterol biosynthesis, DMI                     | 776   | >2000 |       |       | >5000  |
| bixafen                   | F   | complex II succinate-dehydrogenase inhibitor (SDHI)                          | >2000 |       |       |       | >5000  |
| boscalid                  | F   | complex II succinate-dehydrogenase inhibitor (SDHI)                          | >2000 |       |       |       | >5000  |
| bromoxynil                | H   | Inhibition of photosynthesis at PSII histidine 215 binders                   | 217   |       |       |       | 126    |
| bromuconazole             | F   | C <sub>14</sub> -demethylase in sterol biosynthesis, DMI                     | >2150 | >2150 |       |       | 328    |
| bupirimate                | F   | adenosine-deaminase                                                          |       |       | >5000 |       | 4000   |
| buprofezin                | I   | Inhibitor of chitin biosynthesis type 1                                      | >2000 | >2000 |       |       | >2000  |
| carbaryl                  | A/I | AChE inhibitor                                                               |       | >2000 |       |       | 614    |
| carbendazim               | F   | $\beta$ -tubulin assembly in mitosis                                         | >2250 |       |       |       | >10000 |
| carbetamide               | H   | Inhibition of microtubule organization                                       | >2000 |       |       |       | >2000  |
| carbofuran                | A/I | AChE inhibitor                                                               | 8     | 0.76  | 4.9   |       | 5.3    |
| carbosulfan               | I   | AChE inhibitor                                                               | 82    | 10    |       |       | 101    |
| carboxin                  | F   | complex II succinate-dehydrogenase inhibitor (SDHI)                          | >2150 |       |       |       | 2588   |
| carfentrazone-ethyl       | H   | Inhibition of protoporphyrinogen oxidase                                     | >2250 |       |       |       | >5000  |
| chlorantraniliprole       | I   | Ryanodine receptor modulator                                                 | >2250 |       |       |       | >5000  |
| chlorfenapyr              | A/I | Uncoupler of oxidative phosphorylation via disruption of the proton gradient | 34    | 8.3   |       |       | 626    |

|                    |     |                                                                 |       |       |       |        |
|--------------------|-----|-----------------------------------------------------------------|-------|-------|-------|--------|
| chloridazon        | H   | Inhibition of photosynthesis at PSII serine 264 binders         | >2000 |       |       | 2140   |
| chlorotalonil      | F   | multi-site contact activity                                     | >2000 | >2000 |       | >5000  |
| chlorotoluron      | H   | Inhibition of photosynthesis at PSII serine 264 binders         |       | 272   |       | >10000 |
| chlorpropham       | H   | Inhibition of microtubule organization                          |       | >2000 |       | 4200   |
| chlorpyrifos       | A/I | AChE inhibitor                                                  |       | 13.3  |       | 66-195 |
| chlorsulfuron      | H   | Inhibition of acetolactate synthase                             | >5000 | >5000 |       | >5545  |
| cinidon-ethyl      | H   | Inhibition of protoporphyrinogen oxidase                        | >2000 |       |       | >2200  |
| clodinafop         | H   | Inhibition of acetyl-CoA carboxylase                            | 1363  | >1874 |       | 1392   |
| clofentezine       | A   | Mite growth inhibitors affecting CHS1                           |       | >3000 |       | >5200  |
| clomazone          | H   | Inhibition of deoxy- <i>D</i> -xylose phosphate synthase        | >2510 | >2510 |       | 1369   |
| clopyralid         | H   | auxin mimics                                                    |       | 1465  |       | >5000  |
| cloransulam-methyl | H   | Inhibition of acetolactate synthase                             | >2250 |       |       | >5000  |
| clothianidin       | I   | nAChR competitive modulator                                     |       | 430   |       | 389    |
| cyantraniliprole   | I   | Ryanodine receptor modulator                                    | >2250 |       | >2250 | >5000  |
| cyazofamid         | F   | Complex III cytochrome bc1 at Qi site, Quinone inside inhibitor | >2000 | >2000 |       | >5000  |
| cyclanilide        | PGR |                                                                 | 240   |       |       | 208    |
| cyclaniliprole     | I   | Ryanodine receptor modulator                                    | >2000 |       |       | >2000  |
| cycloxydim         | H   | Inhibition of acetyl-CoA carboxylase                            | >2000 |       |       | 3830   |
| cyflufenamid       | F   | Unknown MOA                                                     | >2000 |       |       | >5000  |
| cyflumetofen       | A   | Mitochondrial complex II electron transport inhibitor           | >2000 | >2000 |       | >2000  |
| cyhalofop-butyl    | H   | Inhibition of acetyl-CoA carboxylase                            | >2250 | >2250 |       | >5000  |
| cymoxanil          | F   | Unknown MOA                                                     | >2000 |       |       | 760    |
| cyproconazole      | F   | C <sub>14</sub> -demethylase in sterol biosynthesis, DMI        | 94    | >2000 |       | 350    |
| cyprodinil         | F   | methionine biosynthesis (proposed)                              | >2000 | >500  |       | >2000  |

|                                   |       |                                                                        |       |       |       |      |       |
|-----------------------------------|-------|------------------------------------------------------------------------|-------|-------|-------|------|-------|
| cyromazine                        | A/I   | Moulting disruptor, dipteran                                           | 1785  | >2510 | 2338  |      | 3387  |
| <i>d,d-trans-</i><br>cyphenothrin | I     | Na channel modulator                                                   | >5620 |       |       |      | 188   |
| 2,4-D                             | H     | auxin mimics                                                           | 500   |       | 617.3 | 633  | 554   |
| deet                              | repel | repellant                                                              | 1375  |       |       |      | 2847  |
| deltamethrin                      | I     | Na channel modulator                                                   | >2250 | >4640 |       |      | 87    |
| diazinon                          | A/I   | AChE inhibitor                                                         |       | 1.44  |       |      | 1129  |
| dicamba                           | H     | auxin mimics                                                           | 216   | 1373  |       |      | 1581  |
| dichlobenil                       | H     | Inhibition of cellulose synthesis                                      | 698   |       |       |      | >2000 |
| dichlorprop-P                     | H     | auxin mimics                                                           | 308.1 |       |       |      | 567   |
| 2-ethylhexyl ester                | H     | auxin mimics                                                           | 1010  |       |       |      | 824   |
| diclofop-methyl                   | H     | Inhibition of acetyl-CoA<br>carboxylase                                | >2250 |       |       |      | 512   |
| dicloran                          | F     | cell peroxidation                                                      | 900   |       |       |      | >2000 |
| diethofencarb                     | F     | $\beta$ -tubulin assembly in mitosis                                   | >2250 | >2250 |       |      | >5000 |
| difenoconazole                    | F     | C <sub>14</sub> -demethylase in sterol<br>biosynthesis, DMI            |       |       | >2000 |      | >1453 |
| diflubenzuron                     | I     | inhibitor of chitin biosynthesis<br>affecting CHS1                     | >5000 | >5000 |       |      | >4640 |
| dimethachlor                      | H     | Inhibition of very long-chain<br>fatty acid synthesis                  |       |       | 524   |      | 1600  |
| dimethenamid                      | H     | Inhibition of very long-chain<br>fatty acid synthesis                  | 1908  |       |       |      | 397   |
| dimethoate                        | A/I   | AChE inhibitor                                                         | 10.5  |       |       |      | 245   |
| dimethomorph                      | F     | cellulose synthase                                                     | >2000 | >2000 |       |      | 3900  |
| dimoxystrobin                     | F     | Complex III cytochrome bc1 at<br>Qo site, Quinone outside<br>inhibitor | >2000 |       |       |      | >5000 |
| dinotefuran                       | I     | nAChR competitive modulator                                            |       |       | >2000 |      | >2000 |
| diquat                            | H     | PSI electron diversion                                                 |       | 71    |       | 30.9 | 214   |
| dithianon                         | F     | multi-site contact activity                                            | 309   | >2000 |       |      | 300   |
| diuron                            | H     | Inhibition of photosynthesis at<br>PSII serine 264 binders             | 1104  |       |       |      | 2000  |
| emamectin<br>benzoate             | I     | Glutamate-gated Cl channel<br>allosteric modulator                     |       | 76    |       |      | 83    |
| epoxyconazole                     | F     | C <sub>14</sub> -demethylase in sterol<br>biosynthesis, DMI            | >2000 |       |       |      | 3160  |
| esfenvalerate                     | I     | Na channel modulator                                                   | 1312  |       |       |      | 88.5  |
| ethametsulfuron-<br>methyl        | H     | Inhibition of acetolactate<br>synthase                                 | 2250  |       |       |      | >5000 |

|                |     |                                                                                              |       |       |      |        |
|----------------|-----|----------------------------------------------------------------------------------------------|-------|-------|------|--------|
| ethofumesate   | H   | Inhibition of very long-chain fatty acid synthesis                                           | >2000 | >2000 |      | >5000  |
| ethoprophos    | N/I | AChE inhibitor                                                                               | 6.04  |       |      | 47     |
| ethoxyquin     | F   | anti-oxidant                                                                                 | >2417 |       |      | 1726   |
| ethoxysulfuron | H   | Inhibition of acetolactate synthase                                                          | >2000 | >2000 |      | 3270   |
| etofenprox     | I   | Na channel modulator                                                                         |       | >2000 |      | >2000  |
| etoxazole      | A   | Mite growth inhibitors affecting CHS1                                                        |       | >2000 |      | >5000  |
| etridiazole    | F   | cell peroxidation                                                                            | 560   |       |      | 945    |
| famoxadone     | F   | Complex III cytochrome bc1 at Qo site, Quinone outside inhibitor                             | >2250 |       |      | >5000  |
| fenamidone     | F   | Complex III cytochrome bc1 at Qo site, Quinone outside inhibitor                             | >2000 |       |      | >2028  |
| fenamiphos     | N/I | AChE inhibitor                                                                               | 0.8   |       |      | 6.0    |
| fenarimol      | F   | C <sub>14</sub> -demethylase in sterol biosynthesis, DMI                                     | >2000 |       |      | 2500   |
| fenazaquin     | A   | Mitochondrial complex I electron transport inhibitor                                         | 1747  | >2000 |      | 134    |
| fenbuconazole  | F   | C <sub>14</sub> -demethylase in sterol biosynthesis, DMI                                     | >2150 |       |      | >5000  |
| fenhexamid     | F   | 3-keto reductase, C <sub>4</sub> -demethylation                                              | >2000 |       |      | >5000  |
| fenitrothion   | I   | AChE inhibitor                                                                               |       |       | 34.5 | 330.0  |
| fenoxaprop-P   | H   | Inhibition of acetyl-CoA carboxylase                                                         |       | 2000  |      | >3150  |
| fenoxycarb     | I   | JH mimics                                                                                    | >7000 | >3000 |      | >10000 |
| fenpropidin    | F   | $\Delta^{14}$ -reductase & $\Delta^8 \rightarrow \Delta^7$ -iosmerase in sterol biosynthesis |       | 1899  | 369  | 1452   |
| fenproximate   | A   | Mitochondrial complex I electron transport inhibitor                                         | >2000 | >2000 |      | 245    |
| fenpyrazamine  | F   | 3-keto reductase, C <sub>4</sub> -demethylation                                              | >2000 |       |      | >2000  |
| fipronil       | I/A | GABA-gated Cl channel blocker                                                                | 11.3  |       |      | 92     |
| flazasulfuron  | H   | Inhibition of acetolactate synthase                                                          | >2000 | >2250 |      | >5000  |

|                       |     |                                                                  |       |           |       |          |
|-----------------------|-----|------------------------------------------------------------------|-------|-----------|-------|----------|
| flonicamid            | I   | Chordotonal organ modulator, unidentified target site            | >2000 | 1591-2621 |       | 884-1768 |
| florasulam            | H   | Inhibition of acetolactate synthase                              |       |           | 1046  | >5000    |
| fluazifop-P-butyl     | H   | Inhibition of acetyl-CoA carboxylase                             | >2000 | >3960     |       | 2451     |
| fluazinam             | F   | Uncoupler of oxidative phosphorylation                           | 1782  |           |       | 4100     |
| flubendiamide         | I   | Ryanodine receptor modulator                                     | >2000 |           |       | >2000    |
| fludioxonil           | F   | MAP/histidine-kinase in osmotic signal transduction              | >2000 |           |       | >5000    |
| flufenacet            | H   | Inhibition of very long-chain fatty acid synthesis               | 1608  |           |       | 569      |
| flufenoxuron          | I/A | inhibitor of chitin biosynthesis affecting CHS1                  | >2000 |           |       | >3000    |
| flumetralin           | PGR |                                                                  | >2000 | >2000     |       | >5000    |
| flumioxazin           | H   | Inhibition of protoporphyrinogen oxidase                         | >2250 | >2250     |       | >5000    |
| fluometuron           | H   | Inhibition of photosynthesis at PSII serine 264 binders          | >2150 | 2974      |       | >5000    |
| fluopicolide          | F   | delocalization of spectrin-like proteins                         | >2250 |           |       | >5000    |
| fluopyram             | F   | complex II succinate-dehydrogenase inhibitor (SDHI)              | >2000 |           |       | >2000    |
| fluoxastrobin         | F   | Complex III cytochrome bc1 at Qo site, Quinone outside inhibitor | >2000 |           |       | >2000    |
| flupyradifurone       | I   | nAChR competitive modulator                                      | 232   |           | 330   | >2000    |
| flupyrsulfuron-methyl | H   | Inhibition of acetolactate synthase                              |       | >2250     | >2250 | >5000    |
| fluquinconazole       | F   | C <sub>14</sub> -demethylase in sterol biosynthesis, DMI         | >2000 | >2000     |       | 112      |
| fluroxypyr-meptyl     | H   | auxin mimics                                                     | >2000 |           |       | >2000    |
| flurprimidol          | PGR |                                                                  | >2000 | >2000     |       | 709      |
| flurtamone            | H   | Inhibition of phytoene desaturase                                | >2530 |           |       | >5000    |
| flusilazole           | F   | C <sub>14</sub> -demethylase in sterol biosynthesis, DMI         |       | >1590     |       | 674      |
| flutianil             | F   | Unknown MOA                                                      | >2250 |           |       | >2000    |

|                     |     |                                                          |       |       |       |        |
|---------------------|-----|----------------------------------------------------------|-------|-------|-------|--------|
| flutolanil          | F   | complex II succinate-dehydrogenase inhibitor (SDHI)      | >2000 | >2000 |       | >10000 |
| fluvalinate         | I   | Na channel modulator                                     | >5620 |       |       | 546    |
| fluxapyroxad        | F   | complex II succinate-dehydrogenase inhibitor (SDHI)      | >2000 | >2000 |       | >2000  |
| foramsulfuron       | H   | Inhibition of acetolactate synthase                      | >2000 | >2000 |       | >5000  |
| forchlorfenuron     | PGR |                                                          | >2250 |       |       | 4917   |
| formetanate         | A/I | AChE inhibitor                                           |       | 11.5  |       | 14.8   |
| fosetyl             | F   | host plant defense induction                             | >2000 |       | 4997  | >7080  |
| fosthiazate         | N   | AChE inhibitor                                           | 10    |       |       | 57.0   |
| fuberidazole        | F   | $\beta$ -tubulin assembly in mitosis                     |       |       | >750  | >300   |
| gamma-cyhalothrin   | I   | Na channel modulator                                     | >2000 |       |       | 55     |
| glufosinate         | H   | Inhibition of glutamine synthase                         | >2000 | >2000 |       | 1510.0 |
| glyphosate          | H   | Inhibition of enol pyruvyl shikimate phosphate synthase  | 4334  |       |       | >2000  |
| guazatine           | F   | multi-site contact activity                              |       |       |       | 57.9   |
| halosulfuron-methyl | H   | Inhibition of acetolactate synthase                      | >2250 |       |       | 7758   |
| hexythiazox         | A   | Mite growth inhibitors affecting CHS1                    |       | >2000 |       | >5000  |
| imazalil            | F   | C <sub>14</sub> -demethylase in sterol biosynthesis, DMI |       |       | 510   | 2000   |
| imazamox            | H   | Inhibition of acetolactate synthase                      | >1846 | >1950 |       | >5000  |
| imazaquin           | H   | Inhibition of acetolactate synthase                      | >2150 | >2150 | >2000 | >5000  |
| imazosulfuron       | H   | Inhibition of acetolactate synthase                      | >2250 |       |       | >5000  |
| imidacloprid        | I   | nAChR competitive modulator                              |       |       | 31    | 500    |
| indoxacarb          | I   | Voltage-dependent Na channel blocker                     | 98    |       |       | 268    |
| iodosulfuron        | H   | Inhibition of acetolactate synthase                      | >2000 | >2000 | >2000 | 2678   |

|                     |   |                                                                  |       |       |       |        |
|---------------------|---|------------------------------------------------------------------|-------|-------|-------|--------|
| ioxynil             | H | Inhibition of photosynthesis at PSII histidine 215 binders       |       | 62    |       | 130    |
| ipconazole          | F | C <sub>14</sub> -demethylase in sterol biosynthesis, DMI         | 962   |       |       | 888    |
| iprodione           | F | MAP/histidine-kinase in osmotic signal transduction              | >2000 | >2000 |       | >2000  |
| iprovalicarb        | F | phospholipid biosynthesis and cell wall deposition               | >2000 |       |       | >5000  |
| isofetamid          | F | complex II succinate-dehydrogenase inhibitor (SDHI)              | >2000 |       |       | >2000  |
| isoproturon         | H | Inhibition of photosynthesis at PSII serine 264 binders          | 1401  |       |       | >1826  |
| isopyrazam          | F | complex II succinate-dehydrogenase inhibitor (SDHI)              | >2000 |       |       | 2000   |
| isoxaben            | H | Inhibition of cellulose synthesis                                | >2000 |       |       | >5000  |
| isoxaflutole        | H | Inhibition of hydroxyphenyl pyruvate dioxygenase                 | >2150 | >2150 |       | >5000  |
| kresoxim-methyl     | F | Complex III cytochrome bc1 at Qo site, Quinone outside inhibitor | >2150 |       |       | >5000  |
| lenacil             | H | Inhibition of photosynthesis at PSII serine 264 binders          | >2000 | >2000 |       | >5000  |
| linuron             | H | Inhibition of photosynthesis at PSII serine 264 binders          | 314   |       |       | 1146   |
| lufenuron           | I | inhibitor of chitin biosynthesis affecting CHS1                  | 2000  | 2000  |       | >2000  |
| malathion           | I | AChE inhibitor                                                   | 359   |       |       | 1778.0 |
| mandestrobin        | F | Complex III cytochrome bc1 at Qo site, Quinone outside inhibitor | >2250 |       |       | >2000  |
| mandiproamid        | F | phospholipid biosynthesis and cell wall deposition               |       | >1000 |       | >5000  |
| MCPA                | H | auxin mimics                                                     | 270   |       |       | 962    |
| mecoprop-P          | H | auxin mimics                                                     | 533   |       |       | 704    |
| mefentrifluconazole | F | C <sub>14</sub> -demethylase in sterol biosynthesis, DMI         | 816   | >2000 | >2860 | >2000  |
| mepanipyrim         | F | methionine biosynthesis (proposed)                               | >2250 | >2250 |       | >5000  |



|                     |     |                                                          |       |       |           |
|---------------------|-----|----------------------------------------------------------|-------|-------|-----------|
| mesosulfuron-methyl | H   | Inhibition of acetolactate synthase                      | >2000 | >2000 | >5000     |
| mesotrione          | H   | Inhibition of hydroxyphenyl pyruvate dioxygenase         | >2000 |       | >5000     |
| metaflumizone       | I   | Voltage-dependent Na channel blocker                     | >2025 | >2025 | >5000     |
| metalaxyl-M         | F   | RNA polymerase I                                         | 1180  | 1466  | 375       |
| metamitron          | H   | Inhibition of photosynthesis at PSII serine 264 binders  |       | 1302  | 1183      |
| metazachlor         | H   | Inhibition of very long-chain fatty acid synthesis       | >2000 | >2000 | >2000     |
| metconazole         | F   | C <sub>14</sub> -demethylase in sterol biosynthesis, DMI | 787   |       | 595       |
| methiocarb          | I   | AChE inhibitor                                           |       | 5     | 19        |
| methomyl            | A/I | AChE inhibitor                                           | 24.2  |       | 30        |
| methoxyfenozide     | I   | Ecdysone receptor agonist                                | >2250 |       | >5000     |
| metobromuron        | H   | Inhibition of photosynthesis at PSII serine 264 binders  |       | 1429  | 1000-2150 |
| metosulam           | H   | Inhibition of acetolactate synthase                      | >2250 | >2000 | >5000     |
| metrafenone         | F   | actin/myosin/fimbrin function                            | >2250 | >2250 | >5000     |
| metribuzin          | H   | Inhibition of photosynthesis at PSII serine 264 binders  | 164   |       | 322       |
| metsulfuron-methyl  | H   | Inhibition of acetolactate synthase                      |       | >2510 | >5000     |
| milbemectin         | I   | Glutamate-gated Cl channel allosteric modulator          |       | 347   | 456       |
| molinate            | H   | Inhibition of very long-chain fatty acid synthesis       |       | 389   | 483       |
| myclobutanil        | F   | C <sub>14</sub> -demethylase in sterol biosynthesis, DMI | 510   |       | 1600      |
| napropamide         | H   | Unknown MOA                                              | >2250 |       | 4680      |
| nicosulfuron        | H   | Inhibition of acetolactate synthase                      | >2000 | >2000 | >5000     |
| novaluron           | I   | inhibitor of chitin biosynthesis affecting CHS1          | >2000 | >2000 | >5000     |
| omethoate           | A/I | AChE inhibitor                                           | 9.9   |       | 22        |
| orthosulfamuron     | H   | Inhibition of acetolactate synthase                      | >2000 | >2000 | >5000     |

|                   |   |                                                                  |       |       |        |
|-------------------|---|------------------------------------------------------------------|-------|-------|--------|
| oxadiargyl        | H | Inhibition of protoporphyrinogen oxidase                         |       | >2000 | >802   |
| oxadiazon         | H | Inhibition of protoporphyrinogen oxidase                         | >2150 |       | >5000  |
| oxasulfuron       | H | Inhibition of acetolactate synthase                              | >2250 | >2250 | >5000  |
| oxydemeton-methyl | I | AChE inhibitor                                                   | 34    | 29    | 48.0   |
| oxyfluorfen       | H | Inhibition of protoporphyrinogen oxidase                         | >2150 |       | >5000  |
| paclobutrazol     | F | C <sub>14</sub> -demethylase in sterol biosynthesis, DMI         |       | >2100 | 490    |
| paraquat          | H | PSI electron diversion                                           | 176   | 199   | 283    |
| penconazole       | F | C <sub>14</sub> -demethylase in sterol biosynthesis, DMI         |       | >1590 | <2000  |
| pencycuron        | F | cell division (unknown site)                                     | >2000 |       | >5000  |
| pendimethalin     | H | Inhibition of microtubule assembly                               |       | 1421  | >5000  |
| penflufen         | F | complex II succinate-dehydrogenase inhibitor (SDHI)              | >4000 |       | >2000  |
| penoxsulam        | H | Inhibition of acetolactate synthase                              |       | >2000 | >5000  |
| penthiopyrad      | F | complex II succinate-dehydrogenase inhibitor (SDHI)              | >2250 |       | >2000  |
| permethrin        | I | Na channel modulator                                             | >5000 |       | >2000  |
| pethoxamid        | H | Inhibition of very long-chain fatty acid synthesis               | 1800  |       | 1196   |
| phenmedipham      | H | Inhibition of photosynthesis at PSII serine 264 binders          |       | >2500 | >8000  |
| picloram          | H | auxin mimics                                                     |       | >1944 | 4012   |
| picolinafen       | H | Inhibition of phytoene desaturase                                | >2250 | >2250 | >5000  |
| picoxystrobin     | F | Complex III cytochrome bc1 at Qo site, Quinone outside inhibitor | >2250 |       | >5000  |
| pinoxaden         | H | Inhibition of acetyl-CoA carboxylase                             |       | >2250 | >5000  |
| pirimicarb        | I | AChE inhibitor                                                   | 20.9  | 28.5  | 142    |
| pirimiphos-methyl | I | AChE inhibitor                                                   | 40    |       | 1414.0 |

|                      |     |                                                                  |       |       |       |       |
|----------------------|-----|------------------------------------------------------------------|-------|-------|-------|-------|
| primisulfuron-methyl | H   | Inhibition of acetolactate synthase                              | >2150 |       |       | >5000 |
| prochloraz           | F   | C <sub>14</sub> -demethylase in sterol biosynthesis, DMI         | 662   | >1954 |       | 1023  |
| procymidone          | F   | MAP/histidine-kinase in osmotic signal transduction              | >4092 | >4092 |       | >5000 |
| prohexadione         | PGR |                                                                  | >2000 | >2000 |       | >5000 |
| propaquizafop        | H   | Inhibition of acetyl CoA carboxylase                             | >2000 |       |       | 5000  |
| propargite           | A   | Inhibitor of mitochondrial ATP synthase                          |       | >4640 |       | 2639  |
| propiconazole        | F   | C <sub>14</sub> -demethylase in sterol biosynthesis, DMI         | >2510 | >2510 |       | 1500  |
| propoxycarbazone     | H   | Inhibition of acetolactate synthase                              | >2000 |       |       | >5000 |
| proquinazid          | F   | signal transduction (unknown mechanism)                          | >2250 |       |       | 4846  |
| prosulfocarb         | H   | Inhibition of very long-chain fatty acid synthesis               | >2250 |       |       | 1820  |
| prosulfuron          | H   | Inhibition of acetolactate synthase                              | >2150 | 1300  |       | 986   |
| prothioconazole      | F   | C <sub>14</sub> -demethylase in sterol biosynthesis, DMI         | >2000 |       |       | >6200 |
| pymetrozine          | I   | Chordotonal organ TRPV channel modulator                         | >2000 | >2000 | >2000 | 3586  |
| pyraclostrobin       | F   | Complex III cytochrome bc1 at Qo site, Quinone outside inhibitor | >2000 |       |       | >5000 |
| pyraflufen-ethyl     | H   | Inhibition of protoporphyrinogen oxidase                         | >2000 |       |       | >5000 |
| pyridaben            | I/A | Mitochondrial complex I electron transport inhibitor             | >2250 | >2250 |       | 161   |
| pyridalyl            | I   | Unknown MOA                                                      | >2250 |       |       | >5000 |
| pyridate             | H   | Inhibition of photosynthesis at PSII histidine 215 binders       | 1269  |       |       | >2000 |
| pyrimethanil         | F   | methionine biosynthesis (proposed)                               | >2000 | >2000 |       | 4149  |
| pyriofenone          | F   | actin/myosin/fimbrin function                                    | >2000 |       |       | >2000 |
| pyriproxyfen         | I   | JH mimics                                                        | >1906 | >1906 |       | >5000 |

|               |     |                                                                                              |       |       |         |
|---------------|-----|----------------------------------------------------------------------------------------------|-------|-------|---------|
| pyroxsulam    | H   | Inhibition of acetolactate synthase                                                          | >2000 | >2000 | >2000   |
| quinoxifen    | F   | signal transduction (unknown mechanism)                                                      | >2250 |       | >5000   |
| riflusulfuron | H   | Inhibition of acetolactate synthase                                                          | >2250 | >2250 | >5000   |
| rimsulfuron   | H   | Inhibition of acetolactate synthase                                                          | >2250 | >2000 | >5000   |
| sedaxane      | F   | complex II succinate-dehydrogenase inhibitor (SDHI)                                          | >2000 |       | 2000    |
| silthiofam    | F   | ATP transport (proposed)                                                                     | >2250 |       | >5000   |
| sintofen      | PGR |                                                                                              | >1439 | >1439 | >5000   |
| S-metolachlor | H   | Inhibition of very long-chain fatty acid synthesis                                           | >2194 | >2194 | 2780    |
| spinetoram    | I   | nAChR allosteric modulator, site I                                                           | >2250 | >2250 | >5000   |
| spinosad      | I   | nAChR allosteric modulator, site I                                                           | >2000 | >2000 | >2000   |
| spirodiclofen | I/A | Inhibitor of acetyl CoA carboxylase                                                          | >2000 |       | >2500   |
| spirotriamat  | I/A | Inhibitor of acetyl CoA carboxylase                                                          | >2000 |       | >2000   |
| spiroxamine   | F   | $\Delta^{14}$ -reductase & $\Delta^8 \rightarrow \Delta^7$ -iosmerase in sterol biosynthesis | 565   |       | 500-560 |
| sulcotrione   | H   | Inhibition of hydroxyphenyl pyruvate dioxygenase                                             |       | >1350 | >5000   |
| sulfosulfuron | H   | Inhibition of acetolactate synthase                                                          | >2250 |       | >5000   |
| sulfoxaflor   | I   | nAChR competitive modulator                                                                  | 676   |       | 1000    |
| tebuconazole  | F   | C <sub>14</sub> -demethylase in sterol biosynthesis, DMI                                     | 1988  |       | 1700    |
| tebufenozide  | I   | Ecdysone receptor agonist                                                                    | >2150 |       | >5000   |
| tebufenpyrad  | A/I | Mitochondrial complex I electron transport inhibitor                                         | >2000 | >2000 | 320     |
| teflubenzuron | I   | inhibitor of chitin biosynthesis affecting CHS1                                              | >2250 | >2000 | >5000   |
| tefluthrin    | I   | Na channel modulator                                                                         | 734   | >3690 | 21.8    |
| tembotrione   | H   | Inhibition of hydroxyphenyl pyruvate dioxygenase                                             | >2250 |       | >2000   |

|                      |   |                                                                  |       |       |           |
|----------------------|---|------------------------------------------------------------------|-------|-------|-----------|
| tepraloxydim         | H | Inhibition of acetyl-CoA carboxylase                             | >2000 |       | >2000     |
| terbuthylazine       | H | Inhibition of photosynthesis at PSII serine 264 binders          | 1236  |       | 1000-1590 |
| tetraconazole        | F | C <sub>14</sub> -demethylase in sterol biosynthesis, DMI         | 132   |       | 1031      |
| tetramethrin         | I | Na channel modulator                                             | >2250 |       | >5000     |
| thiabendazole        | F | $\beta$ -tubulin assembly in mitosis                             | >2250 |       | 3100      |
| thiacloprid          | I | nAChR competitive modulator                                      | 2716  | 49    | 444       |
| thiamethoxam         | I | nAChR competitive modulator                                      | 1552  |       | >5000     |
| thiencarbazonemethyl | H | Inhibition of acetolactate synthase                              | >2000 |       | >2000     |
| thifensulfuronmethyl | H | Inhibition of acetolactate synthase                              |       | >2510 | >5000     |
| thiodicarb           | I | AChE inhibitor                                                   | 2023  |       | 50        |
| thiram               | F | multi-site contact activity                                      | 930   |       | 1800      |
| tolclofosmethyl      | F | cell peroxidation                                                | >5000 | >5000 | >5000     |
| tolyfluanid          | F | multi-site contact activity                                      | >2000 |       | >5000     |
| topramezone          | H | Inhibition of hydroxyphenyl pyruvate dioxygenase                 | >2000 |       | >2000     |
| tralkoxydim          | H | Inhibition of acetyl-CoA carboxylase                             |       |       | 2024 934  |
| transfluthrin        | I | Na channel modulator                                             | >1890 | >1890 | >5000     |
| triadimenol          | F | C <sub>14</sub> -demethylase in sterol biosynthesis, DMI         | >2000 |       | 689       |
| triasulfuron         | H | Inhibition of acetolactate synthase                              | >2150 | >2150 | >5000     |
| tribenuron           | H | Inhibition of acetolactate synthase                              | >2250 |       | >5000     |
| triclopyr            | H | auxin mimics                                                     |       | 1698  | 630       |
| 2-butoxyethyl ester  | H | auxin mimics                                                     | 735   | >4640 | 803       |
| tricyclazole         | F | reductase in melanin biosynthesis                                | >2176 |       | 237       |
| trifloxystrobin      | F | Complex III cytochrome bc1 at Qo site, Quinone outside inhibitor | >2000 | >2250 | >5000     |
| triflumizole         | F | C <sub>14</sub> -demethylase in sterol biosynthesis, DMI         | >2510 |       | 1057      |
| triflumuron          | I | inhibitor of chitin biosynthesis affecting CHS1                  | 561   |       | >5000     |

|               |     |                                                          |       |       |         |
|---------------|-----|----------------------------------------------------------|-------|-------|---------|
| trifluralin   | H   | Inhibition of microtubule assembly                       | >2250 |       | >5000   |
| trinexapac    | PGR |                                                          | >2250 | >2000 | 4210    |
| triticonazole | F   | C <sub>14</sub> -demethylase in sterol biosynthesis, DMI | >2000 | >2000 | >2000   |
| valifenalate  | F   | phospholipid biosynthesis and cell wall deposition       | >2250 | >2250 | >5000   |
| warfarin      | R   |                                                          | >2000 |       | 1.6-323 |
| zoxamide      | F   | $\beta$ -tubulin assembly in mitosis                     | >2000 |       | >5000   |

---

a) acaricide; I, insecticide; F, fungicide; H, herbicide; PGR, plant growth regulator; repel, repellent. b) According to Resistance Action Committee of insecticide (IRAC), fungicide (FRAC) & herbicide (HRAC). c) Taken from EFSA Journal (<https://efsa.onlinelibrary.wiley.com>) and US EPA Reregistration Eligibility Decision (<https://archive.epa.gov/pesticides/reregistration/web/html/status.html>).
